# Supplementary material
Source: HighWire-hosted journal article supplement (https://rapm.bmj.com/content/49/1/30)
Supplement: inline-supplementary-material-2 [file inline-supplementary-material-2.pdf]

Supplemental Table 3. Demographic and Clinical Characteristics of Matched and Unmatched Cohorts

|                                                   | ISD<br>N= 3,682 |       | MILD<br>N= 5,499 |       | SMD    | Matched ISD<br>N= 3,614 |       | Matched MILD<br>N= 3,614 |       | SMD   |
|---------------------------------------------------|-----------------|-------|------------------|-------|--------|-------------------------|-------|--------------------------|-------|-------|
| <b>Demographics at Index Diagnosis</b>            |                 |       |                  |       |        |                         |       |                          |       |       |
| <b>Age at Index<sup>a</sup> (Mean, SD)</b>        | 74.0            | 7.9   | 74.9             | 7.6   | 10.621 | 74.1                    | 7.9   | 74.2                     | 7.6   | 1.014 |
| <b>Sex<sup>a</sup> (N, %)</b>                     |                 |       |                  |       | 4.015  |                         |       |                          |       | 0.612 |
| Female                                            | 2,017           | 54.8% | 3,122            | 56.8% |        | 1,984                   | 54.9% | 1,995                    | 55.2% |       |
| Male                                              | 1,665           | 45.2% | 2,377            | 43.2% |        | 1,630                   | 45.1% | 1,619                    | 44.8% |       |
| <b>Region<sup>a</sup> (N, %)</b>                  |                 |       |                  |       | 11.792 |                         |       |                          |       | 0.973 |
| Midwest                                           | 1,076           | 29.2% | 1,666            | 30.3% |        | 1,066                   | 29.5% | 1,066                    | 29.5% |       |
| Northeast                                         | 395             | 10.7% | 625              | 11.4% |        | 392                     | 10.8% | 395                      | 10.9% |       |
| South                                             | 1,666           | 45.2% | 2,602            | 47.3% |        | 1,651                   | 45.7% | 1,682                    | 46.5% |       |
| West                                              | 543             | 14.7% | 599              | 10.9% |        | 505                     | 14.0% | 471                      | 13.0% |       |
| Other/unknown                                     | 2               | 0.1%  | 7                | 0.1%  |        | 0                       | 0.0%  | 0                        | 0.0%  |       |
| <b>Race<sup>a</sup> (N, %)</b>                    |                 |       |                  |       | 11.107 |                         |       |                          |       | 3.470 |
| Caucasian                                         | 3,374           | 91.6% | 4,949            | 90.0% |        | 3,318                   | 91.8% | 3,359                    | 92.9% |       |
| Black                                             | 160             | 4.3%  | 371              | 6.7%  |        | 160                     | 4.4%  | 130                      | 3.6%  |       |
| Other/unknown                                     | 148             | 4.0%  | 179              | 3.3%  |        | 136                     | 3.8%  | 125                      | 3.5%  |       |
| <b>Year of Index Procedure<sup>a</sup> (N, %)</b> |                 |       |                  |       | 35.014 |                         |       |                          |       | 0.359 |
| 2017                                              | 186             | 5.1%  | 666              | 12.1% |        | 186                     | 5.1%  | 168                      | 4.6%  |       |
| 2018                                              | 459             | 12.5% | 1,044            | 19.0% |        | 459                     | 12.7% | 457                      | 12.6% |       |
| 2019                                              | 1,051           | 28.5% | 1,481            | 26.9% |        | 1,042                   | 28.8% | 1,091                    | 30.2% |       |
| 2020                                              | 1,311           | 35.6% | 1,434            | 26.1% |        | 1,266                   | 35.0% | 1,232                    | 34.1% |       |
| 2021 (up to 9/31/2021)                            | 675             | 18.3% | 874              | 15.9% |        | 661                     | 18.3% | 666                      | 18.4% |       |

|                                                                          |       |       |       |       |       |       |       |       |       |         |
|--------------------------------------------------------------------------|-------|-------|-------|-------|-------|-------|-------|-------|-------|---------|
| <b>Charlson Comorbidity Index during baseline (Mean, SD)<sup>a</sup></b> | 1.2   | 1.6   | 1.0   | 1.5   | 7.858 | 1.1   | 1.5   | 1.1   | 1.6   | 2.55012 |
| Clinical comorbid conditions during baseline                             |       |       |       |       |       |       |       |       |       |         |
| Asthma                                                                   | 351   | 9.5%  | 404   | 7.3%  | N/A   | 340   | 9.4%  | 280   | 7.7%  | N/A     |
| Back syndrome                                                            | 176   | 4.8%  | 200   | 3.6%  | N/A   | 173   | 4.8%  | 142   | 3.9%  | N/A     |
| Chronic obstructive pulmonary disease                                    | 536   | 14.6% | 626   | 11.4% | N/A   | 518   | 14.3% | 434   | 12.0% | N/A     |
| Diabetes                                                                 | 1,008 | 27.4% | 1,434 | 26.1% | N/A   | 987   | 27.3% | 951   | 26.3% | N/A     |
| Diabetic neuropathy                                                      | 242   | 6.6%  | 361   | 6.6%  | N/A   | 236   | 6.5%  | 245   | 6.8%  | N/A     |
| Hypertension                                                             | 2,377 | 64.6% | 3,294 | 59.9% | N/A   | 2,339 | 64.7% | 2,148 | 59.4% | N/A     |
| Congestive heart failure                                                 | 375   | 10.2% | 503   | 9.1%  | N/A   | 363   | 10.0% | 363   | 10.0% | N/A     |
| Intervertebral disc disorders                                            | 1,223 | 33.2% | 1,454 | 26.4% | N/A   | 1,202 | 33.3% | 968   | 26.8% | N/A     |
| Obesity                                                                  | 561   | 15.2% | 838   | 15.2% | N/A   | 550   | 15.2% | 589   | 16.3% | N/A     |
| Osteoarthritis                                                           | 1,319 | 35.8% | 1,837 | 33.4% | N/A   | 1,294 | 35.8% | 1,217 | 33.7% | N/A     |
| Osteoporosis                                                             | 438   | 11.9% | 511   | 9.3%  | N/A   | 430   | 11.9% | 330   | 9.1%  | N/A     |
| Closed hip, vertebral, lumbar or spinal fracture                         | 54    | 1.5%  | 98    | 1.8%  | N/A   | 53    | 1.5%  | 57    | 1.6%  | N/A     |
| Lumbar spondylolisthesis                                                 | 431   | 11.7% | 577   | 10.5% | N/A   | 428   | 11.8% | 374   | 10.3% | N/A     |
| Spondylolisthesis in other spinal regions                                | 132   | 3.6%  | 179   | 3.3%  | N/A   | 128   | 3.5%  | 106   | 2.9%  | N/A     |
| Vascular claudication                                                    | 71    | 1.9%  | 65    | 1.2%  | N/A   | 69    | 1.9%  | 47    | 1.3%  | N/A     |

ISD, interspinous spacer; MILD, minimally invasive lumbar decompression; SD, standard deviation; SMD, standardized mean difference

a: These patient characteristics were used in the propensity score matching process.
